# Supplementary material for: Boosting the initial coulombic efficiency in silicon anodes through interfacial incorporation of metal nanocrystals
Source: Royal Society of Chemistry journal article supplement (doi:10.1039/c9ta05340a), 2019-01-01
Supplement: c9ta05340a1.pdf [file c9ta05340a1.pdf]

## Supporting information

### **Boosting initial coulombic efficiency in silicon anodes through interfacial incorporation of metal nanocrystals**

Fangzhou Zhang,<sup>a</sup> Guanjia Zhu,<sup>a</sup> Kai Wang,<sup>a</sup> Xiaoyong Qian,<sup>a</sup> Yuye Zhao,<sup>a</sup> Wei Luo<sup>a</sup> and Jianping Yang<sup>\*a</sup>

<sup>a</sup> State Key Laboratory for Modification of Chemical Fibers and Polymer Materials, College of Materials Science and Engineering, Donghua University, Shanghai 201620, P. R. China

E-mail: [jianpingyang@dhu.edu.cn](mailto:jianpingyang@dhu.edu.cn)

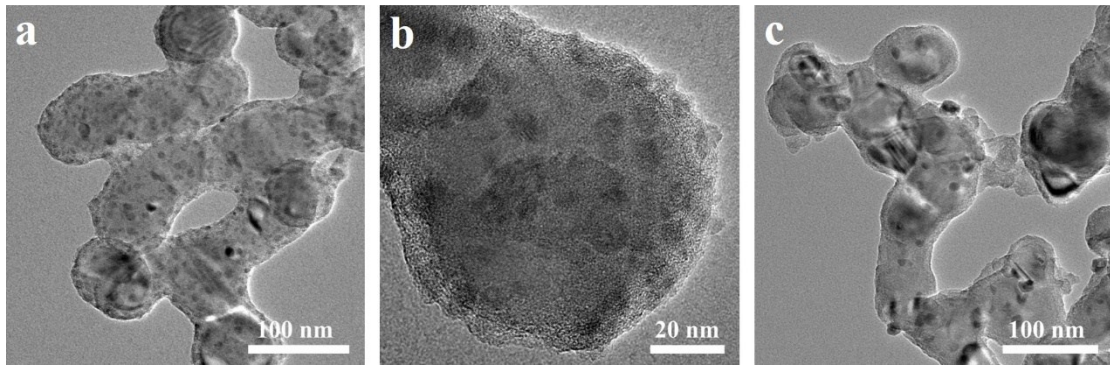

**Fig. S1** (a) TEM and (b) HRTEM image of Si@C-Fe, (c) TEM image of Si@pC-Cu.

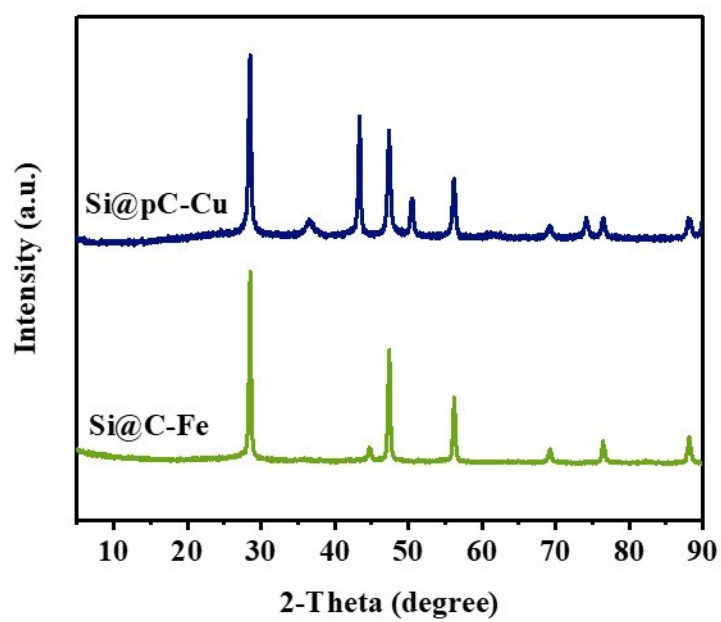

**Fig. S2** XRD pattern of Si@C-Fe and Si@pC-Cu.

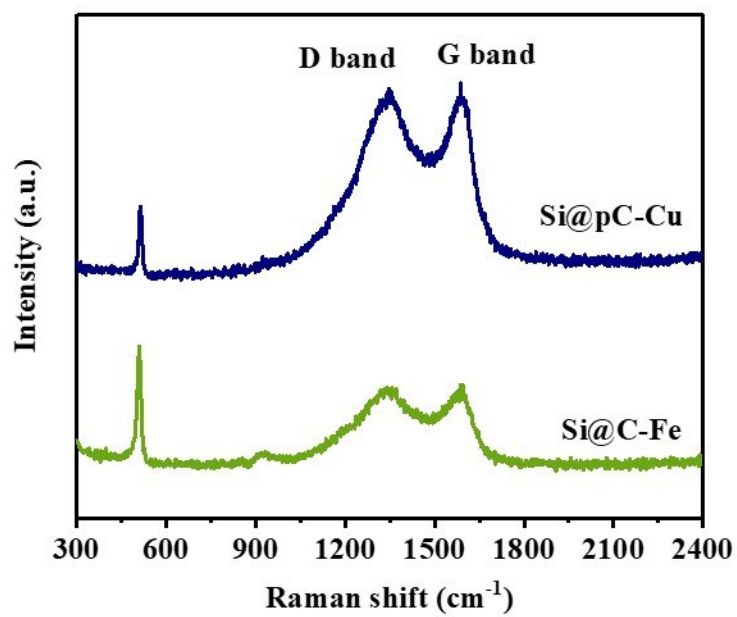

**Fig. S3** Raman spectra of Si@C-Fe and Si@pC-Cu.

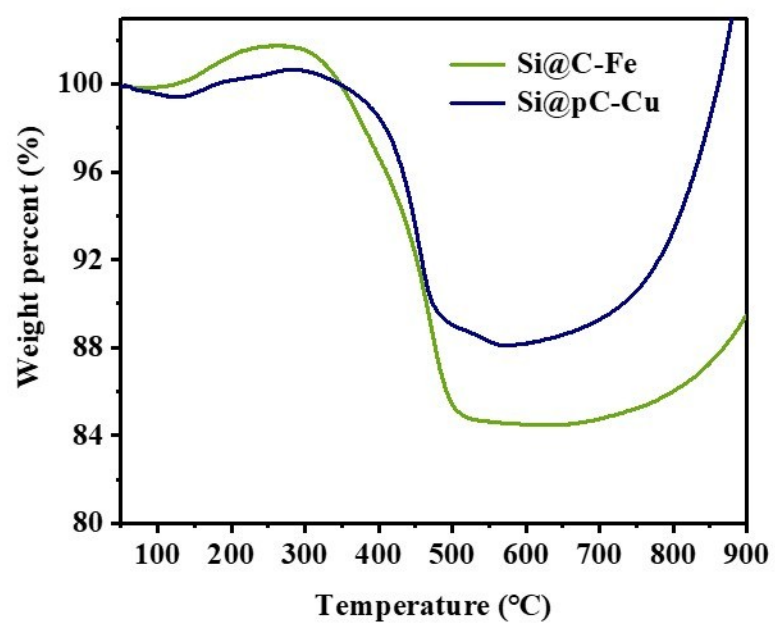

**Fig. S4** TGA curves of Si@C-Fe and Si@pC-Cu.

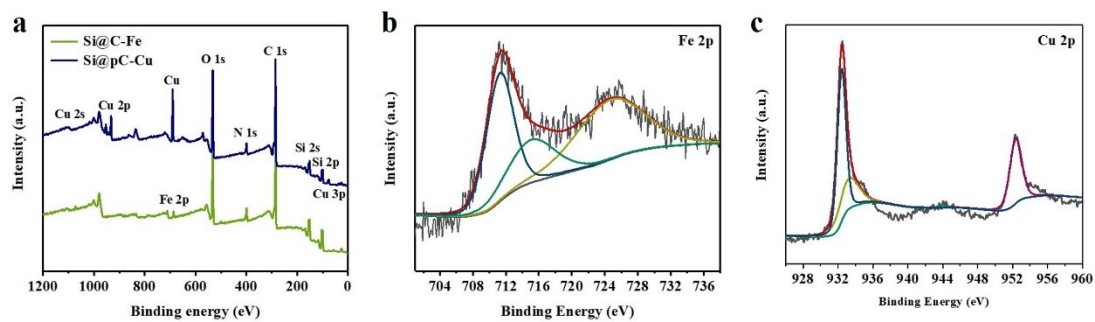

**Fig. S5** (a) XPS survey spectra of Si@C-Fe and Si@pC-Cu. (b) Fe 2p XPS spectra of Si@C-Fe and (c) Cu 2p XPS spectra of Si@pC-Cu.

| sample   | Proportion (%) |      |       | Initial charge capacity<br>(mA h g <sup>-1</sup> ) | Initial discharge capacity<br>(mA h g <sup>-1</sup> ) | ICE<br>(%) |
|----------|----------------|------|-------|----------------------------------------------------|-------------------------------------------------------|------------|
|          | Si             | C    | Metal |                                                    |                                                       |            |
| Si@C-Fe  | 81             | 15.5 | 3.5   | 1761                                               | 2243                                                  | 78.5       |
| Si@pC    | 85.9           | 14.1 | 0     | 1902                                               | 2473                                                  | 76.9       |
| Si@pC-Ag | 83.2           | 11.6 | 5.2   | 1886                                               | 2360                                                  | 79.9       |
| Si@pC-Cu | 83.6           | 11.9 | 4.5   | 1697                                               | 2148                                                  | 79         |

**Table S1.** Composition and initial electrochemical detail of Si@C-Fe, Si@pC, Si@pC-Ag, Si@pC-Cu electrode.

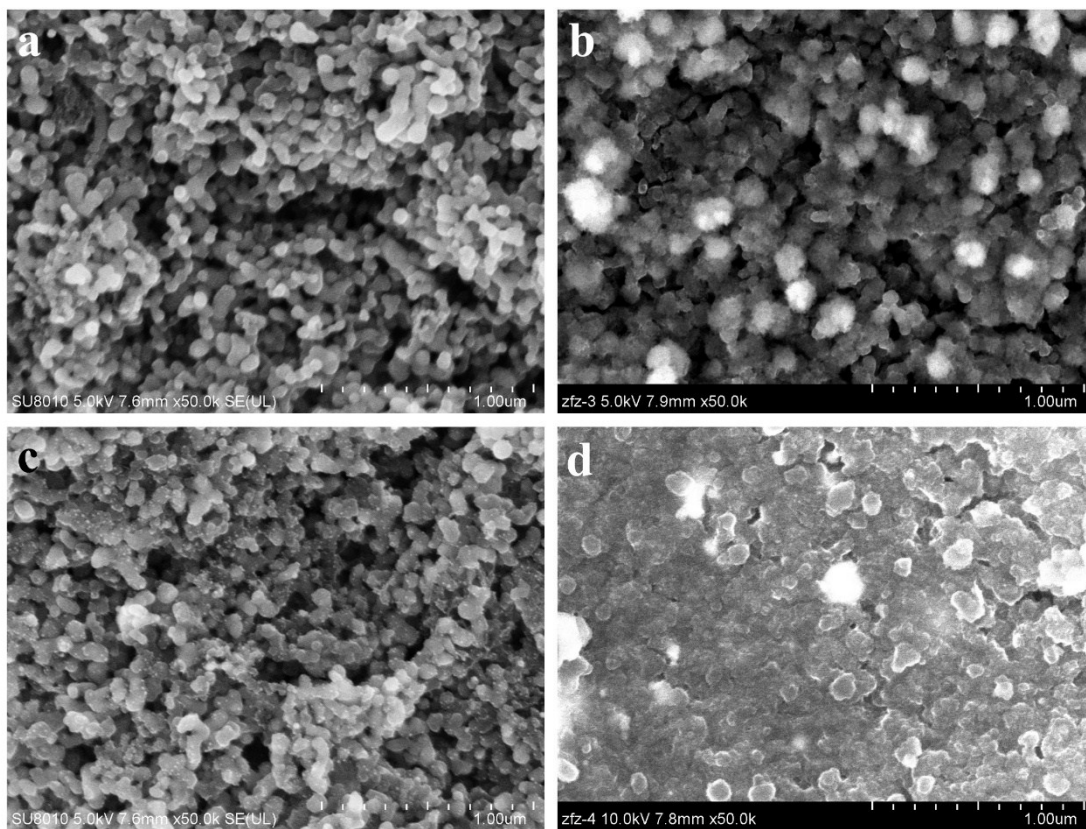

**Fig. S6** SEM images of Si@pC and Si@pC-Ag electrodes surface before (a, c) and after 50 cycles (b, d).

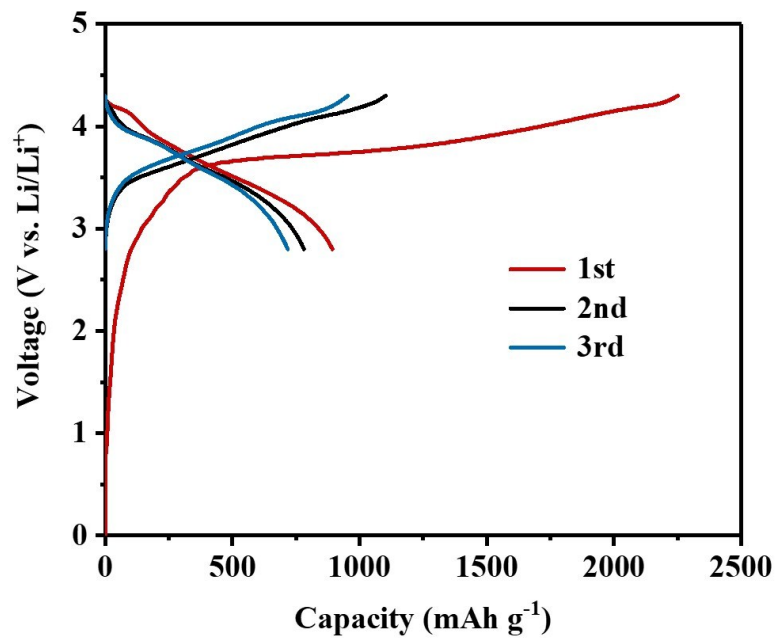

**Fig. S7** Charge/discharge curves of the full cell that paired the Si@pC-Ag anode with a commercial NCM811 cathode at a current density of 100 mA g<sup>-1</sup>.



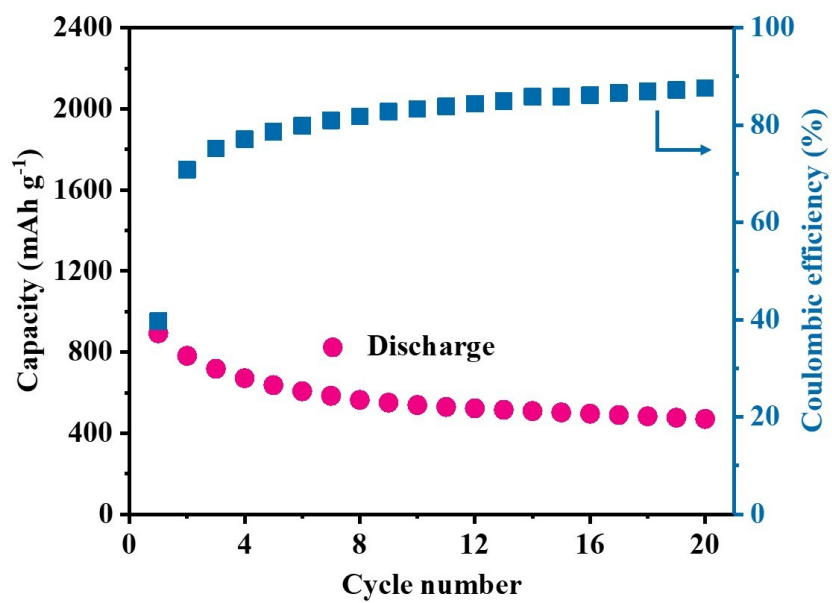

**Fig. S8** Cyclic performance of the full cell at a current density of 100 mA g<sup>-1</sup>.
